# Supplementary material
Source: PubMed Central journal article supplement (PMC6233639)
Supplement: jamacardiol-3-865-s001.pdf [file jamacardiol-3-865-s001.pdf]

## Supplementary Online Content

Alexander KM, Orav J, Singh A, et al. Geographic disparities in reported US amyloidosis mortality from 1979 to 2015: potential underdetection of cardiac amyloidosis. *JAMA Cardiol.* Published online July 25, 2018. doi:10.1001/jamacardio.2018.2093

**eTable.** Fifteen US Counties With the Highest Reported Death Rates During 1999-2015

**eFigure 1.** Temporal Trends in Reported Amyloidosis Mortality

**eFigure 2.** Geographic Trends in Reported Amyloidosis Mortality

**eFigure 3.** Underlying Cause of Death in Individuals with Reported Amyloidosis Mortality

**eFigure 4.** Reported Amyloidosis-associated Comorbidities Stratified by Sex

**eFigure 5.** Reported Amyloidosis-associated Comorbidities Stratified by Race

This supplementary material has been provided by the authors to give readers additional information about their work.

**eTable.** Fifteen US Counties with the Highest Reported Death Rates, 1999-2015

| <b>County<sup>a</sup></b> | <b>Number of Deaths</b> | <b>Population</b> | <b>Age-adjusted Death Rate Per 1,000,000 (95% CI)</b> |
|---------------------------|-------------------------|-------------------|-------------------------------------------------------|
| Mower County, MN          | 31                      | 661,404           | <b>31.73</b> (21.41-45.30)                            |
| Olmsted County, MN        | 62                      | 2,351,817         | <b>25.45</b> (19.46-32.69)                            |
| Johnson County, IA        | 23                      | 2,134,852         | <b>14.81</b> (9.28-22.42)                             |
| Linn County, IA           | 49                      | 3,489,105         | <b>13.54</b> (10.02-17.90)                            |
| Suffolk County, MA        | 133                     | 12,152,667        | <b>12.84</b> (10.65-15.03)                            |
| Chittenden County, VT     | 29                      | 2,614,954         | <b>12.51</b> (8.38-17.97)                             |
| St. Louis City, MO        | 65                      | 5,552,813         | <b>12.00</b> (9.24-15.32)                             |
| Albemarle County, VA      | 22                      | 1,596,785         | <b>11.83</b> (7.42-17.91)                             |
| Black Hawk County, IA     | 27                      | 2,199,030         | <b>10.86</b> (7.15-15.79)                             |
| District of Columbia      | 101                     | 10,140,487        | <b>10.47</b> (8.42-12.52)                             |
| San Francisco County, CA  | 163                     | 13,534,586        | <b>10.38</b> (8.78-11.99)                             |
| La Crosse County, WI      | 21                      | 1,907,047         | <b>10.38</b> (6.34-16.03)                             |
| Ramsey County, MN         | 87                      | 8,695,572         | <b>10.32</b> (8.26-12.75)                             |
| Cuyahoga County, OH       | 291                     | 22,370,345        | <b>10.26</b> (9.08-11.45)                             |
| Norfolk County, MA        | 132                     | 11,304,984        | <b>9.73</b> (8.06-11.40)                              |
| <b>National</b>           | 26 591                  | 5,112,618,876     | <b>4.95</b> (4.89-5.01)                               |

<sup>a</sup>Each of these counties has an amyloidosis referral center located within 400 km. (Amyloidosis Foundation, <http://www.amyloidosis.org/resources/#treatment-centers>; Amyloidosis Research Consortium, <http://www.arci.org/collaborative-network/>).

**eFigure 1.** Temporal Trends in Reported Amyloidosis Mortality

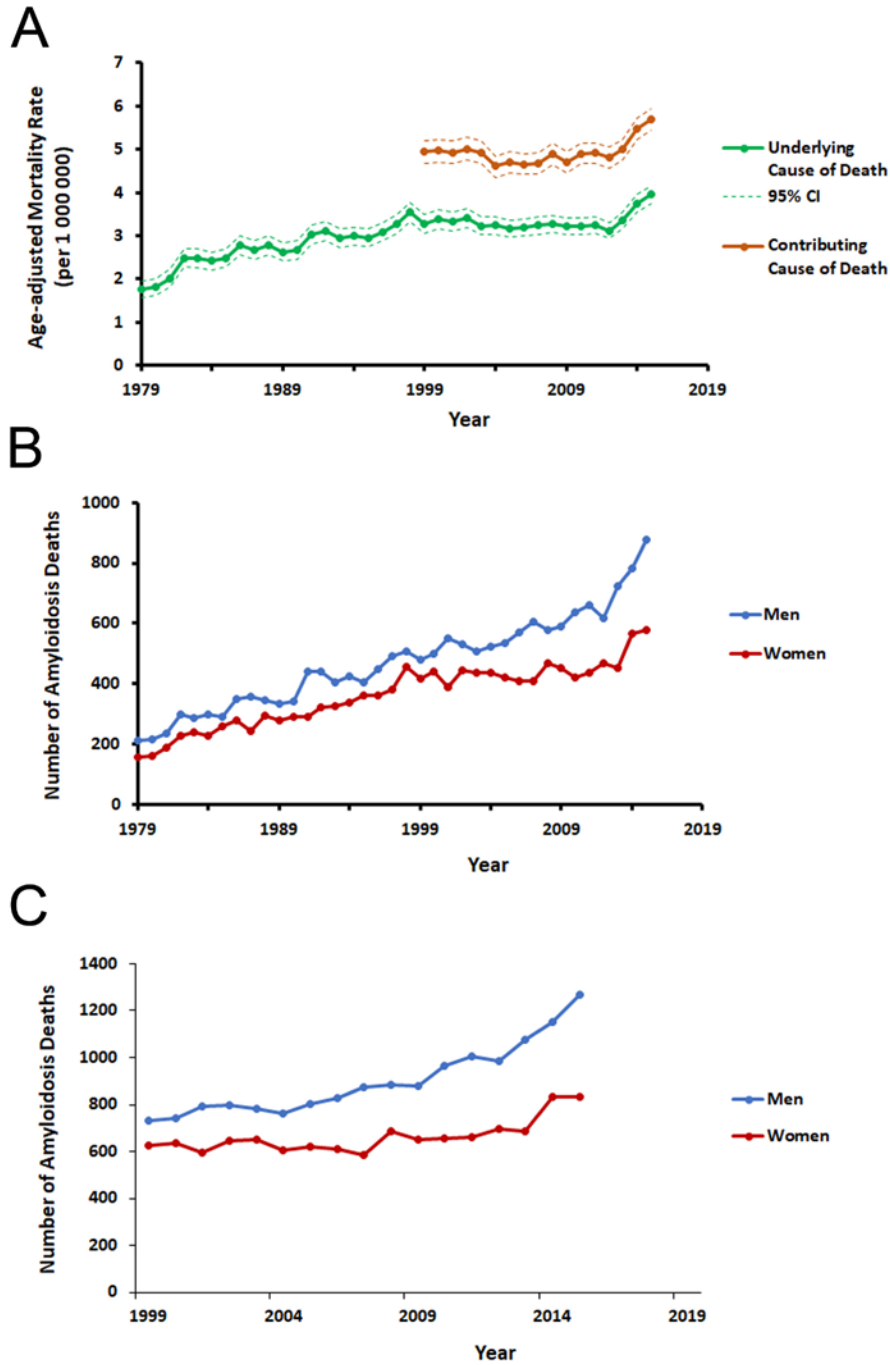

Temporal trends in the overall reported age-adjusted amyloidosis death rates as the underlying (green) or contributing (orange) cause per 1,000,000 during 1979-2015 (A). Number of deaths for amyloidosis as an underlying cause during 1979-2015 for men and women (B). Number of deaths for amyloidosis as a contributing cause during 1999-2015 for men and women (C). For Figures 1B and 1C, data for men are depicted in blue and for women in red.

**eFigure 2. Geographic Trends in Reported Amyloidosis Mortality**

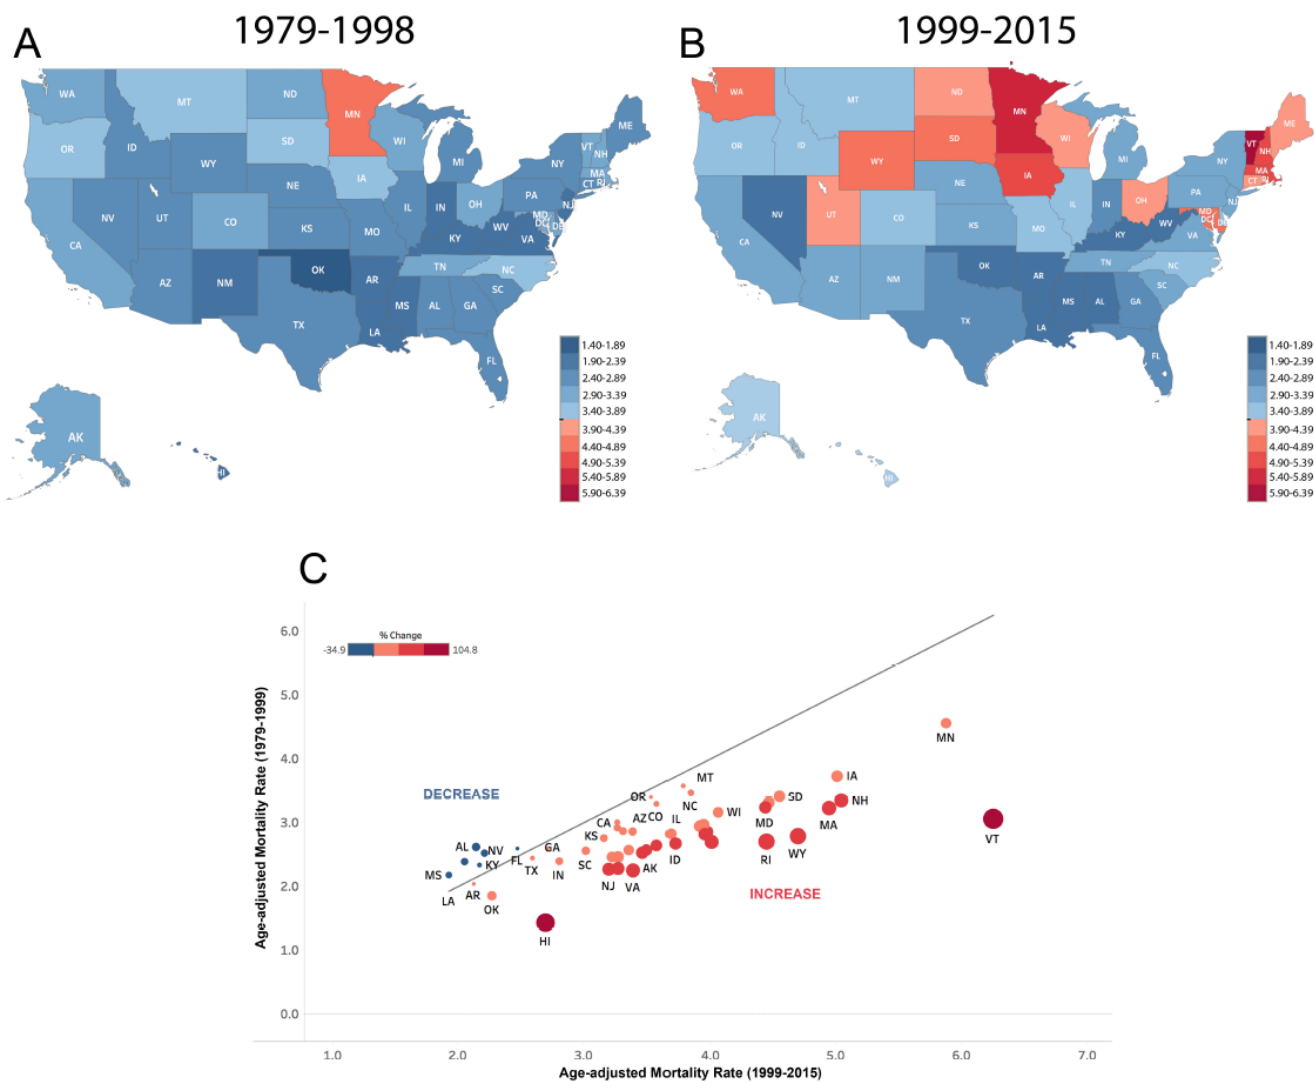

Geographic distribution of reported age-adjusted death rates per 1,000,000 persons for amyloidosis as an underlying cause of death in the US during 1979-1998 (A) and 1999-2015 (B). Reported state death rates during 1979-1998 compared with 1999-2015. Darker and larger circles indicate a greater magnitude of change. Blue color indicates an increase in death rate from 1979-1998 to 1999-2015, and red indicates a decrease in death rate (C).

**eFigure 3.** Underlying Cause of Death in Individuals with Reported Amyloidosis Mortality

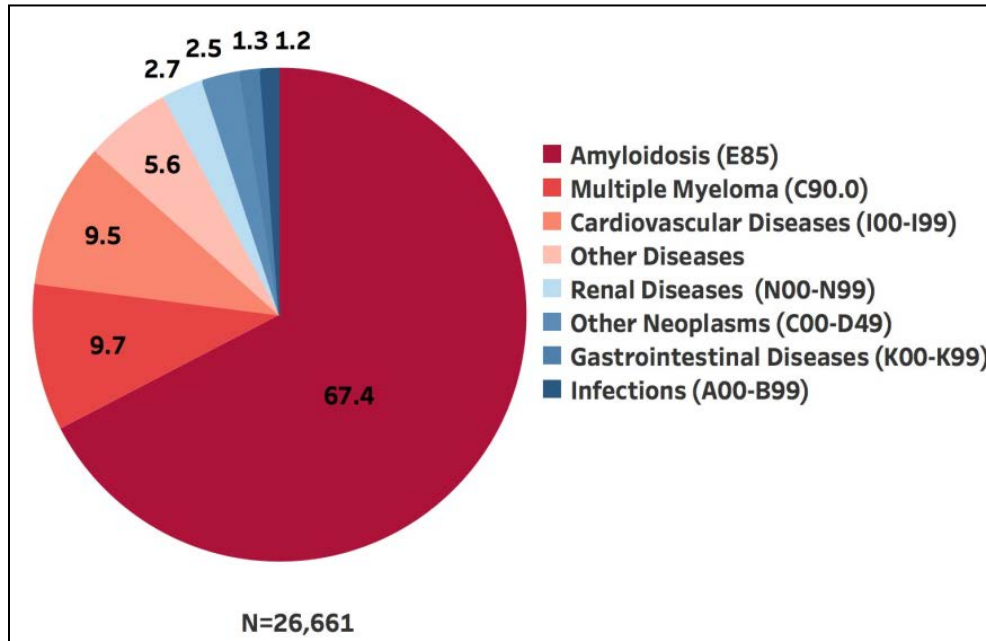

Reported comorbidities in individuals with amyloidosis-related death, 1999-2015. Multiple cause of death data downloaded from the National Center for Health Statistics (N=26,661) had 70 (0.003%) more records compared with multiple cause of death data from CDC WONDER (N=26,591).

**eFigure 4.** Reported Amyloidosis-associated Comorbidities Stratified by Sex

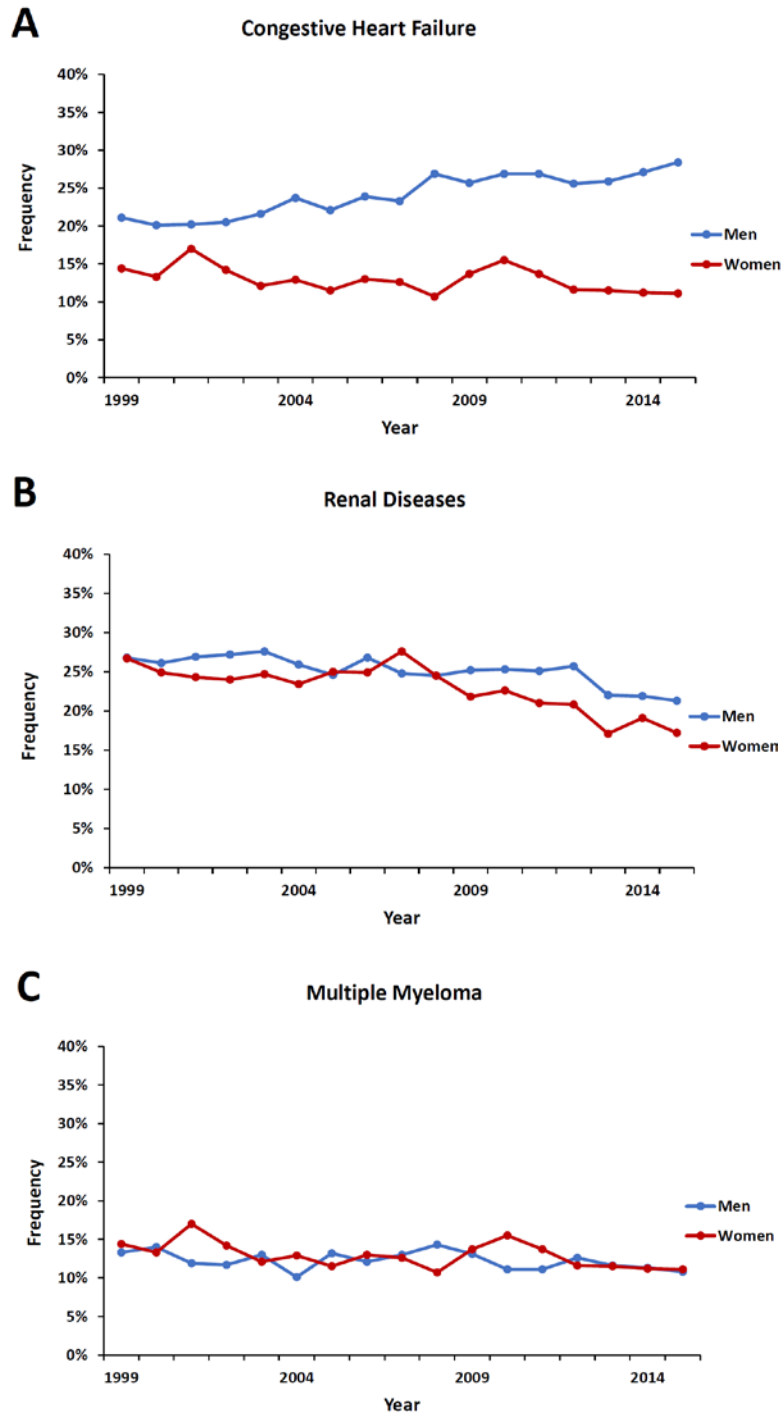

Frequency of reported amyloidosis-associated comorbidities stratified by sex for congestive heart failure (A), renal diseases (B), and multiple myeloma (C).

**eFigure 5.** Reported Amyloidosis-associated Comorbidities Stratified by Race

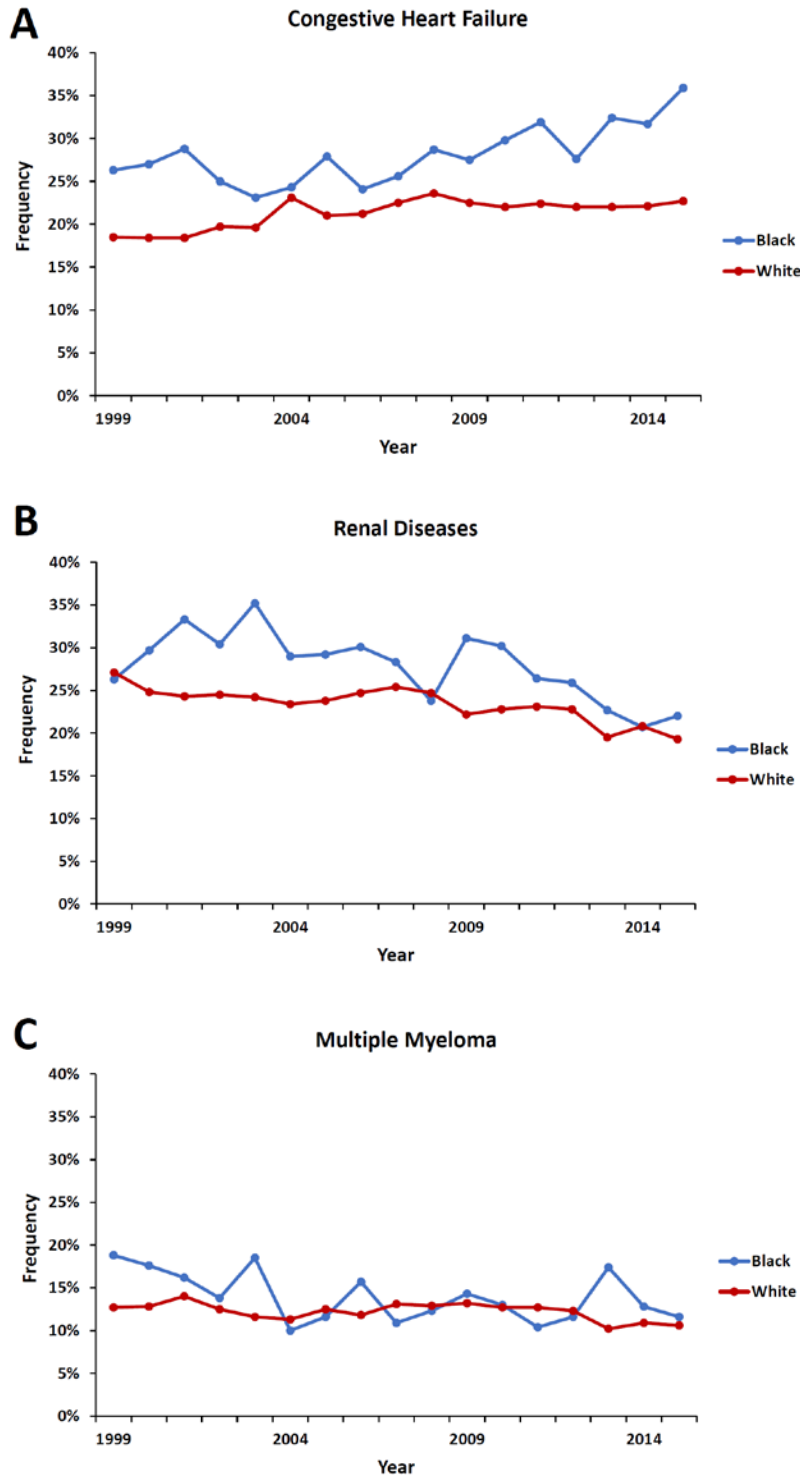

Frequency of reported amyloidosis associated comorbidities stratified by race for congestive heart failure (A), renal diseases (B), and multiple myeloma (C).
